# Supplementary material for: Metabolic targeting of EGFRvIII/PDK1 axis in temozolomide resistant glioblastoma
Source: PubMed Central journal article supplement (PMC5482605; doi:10.18632/oncotarget.16767), 2017-03-31
Supplement: oncotarget-08-35639-s001.pdf [file oncotarget-08-35639-s001.pdf]

## Metabolic targeting of EGFRvIII/PDK1 axis in temozolomide resistant glioblastoma

### Supplementary Material

#### Supplementary Table-1

|             |                         |
|-------------|-------------------------|
| EGFR-F:     | CCACCAAATTAGCCTGGACA    |
| EGFR-R:     | CGCGACCCTTAGGTATTCTG    |
| EGFRvIII-F: | CTCTGGAGGAAAAGAAAGGTAA  |
| EGFRvIII-R: | AGGCCCTTCGCACTTCTTAC    |
| PDK1-F      | CTGTGATACGGATCAGAAACCG  |
| PDK1-R      | TCCACCAAACAATAAAGAGTGCT |
| GAPDH-F     | AATCCCATCACCATCTTCCA    |
| GAPDH-R     | TGGACTCCACGACGTACTCA    |
